# Supplementary material for: ‘We spray and walk away’: wall modifications decrease the impact of indoor residual spray campaigns through reductions in post-spray coverage
Source: PubMed Central journal article supplement (PMC6969461; doi:10.1186/s12936-020-3102-6), 2020-01-17

### A) South Africa, IRS with deltamethrin

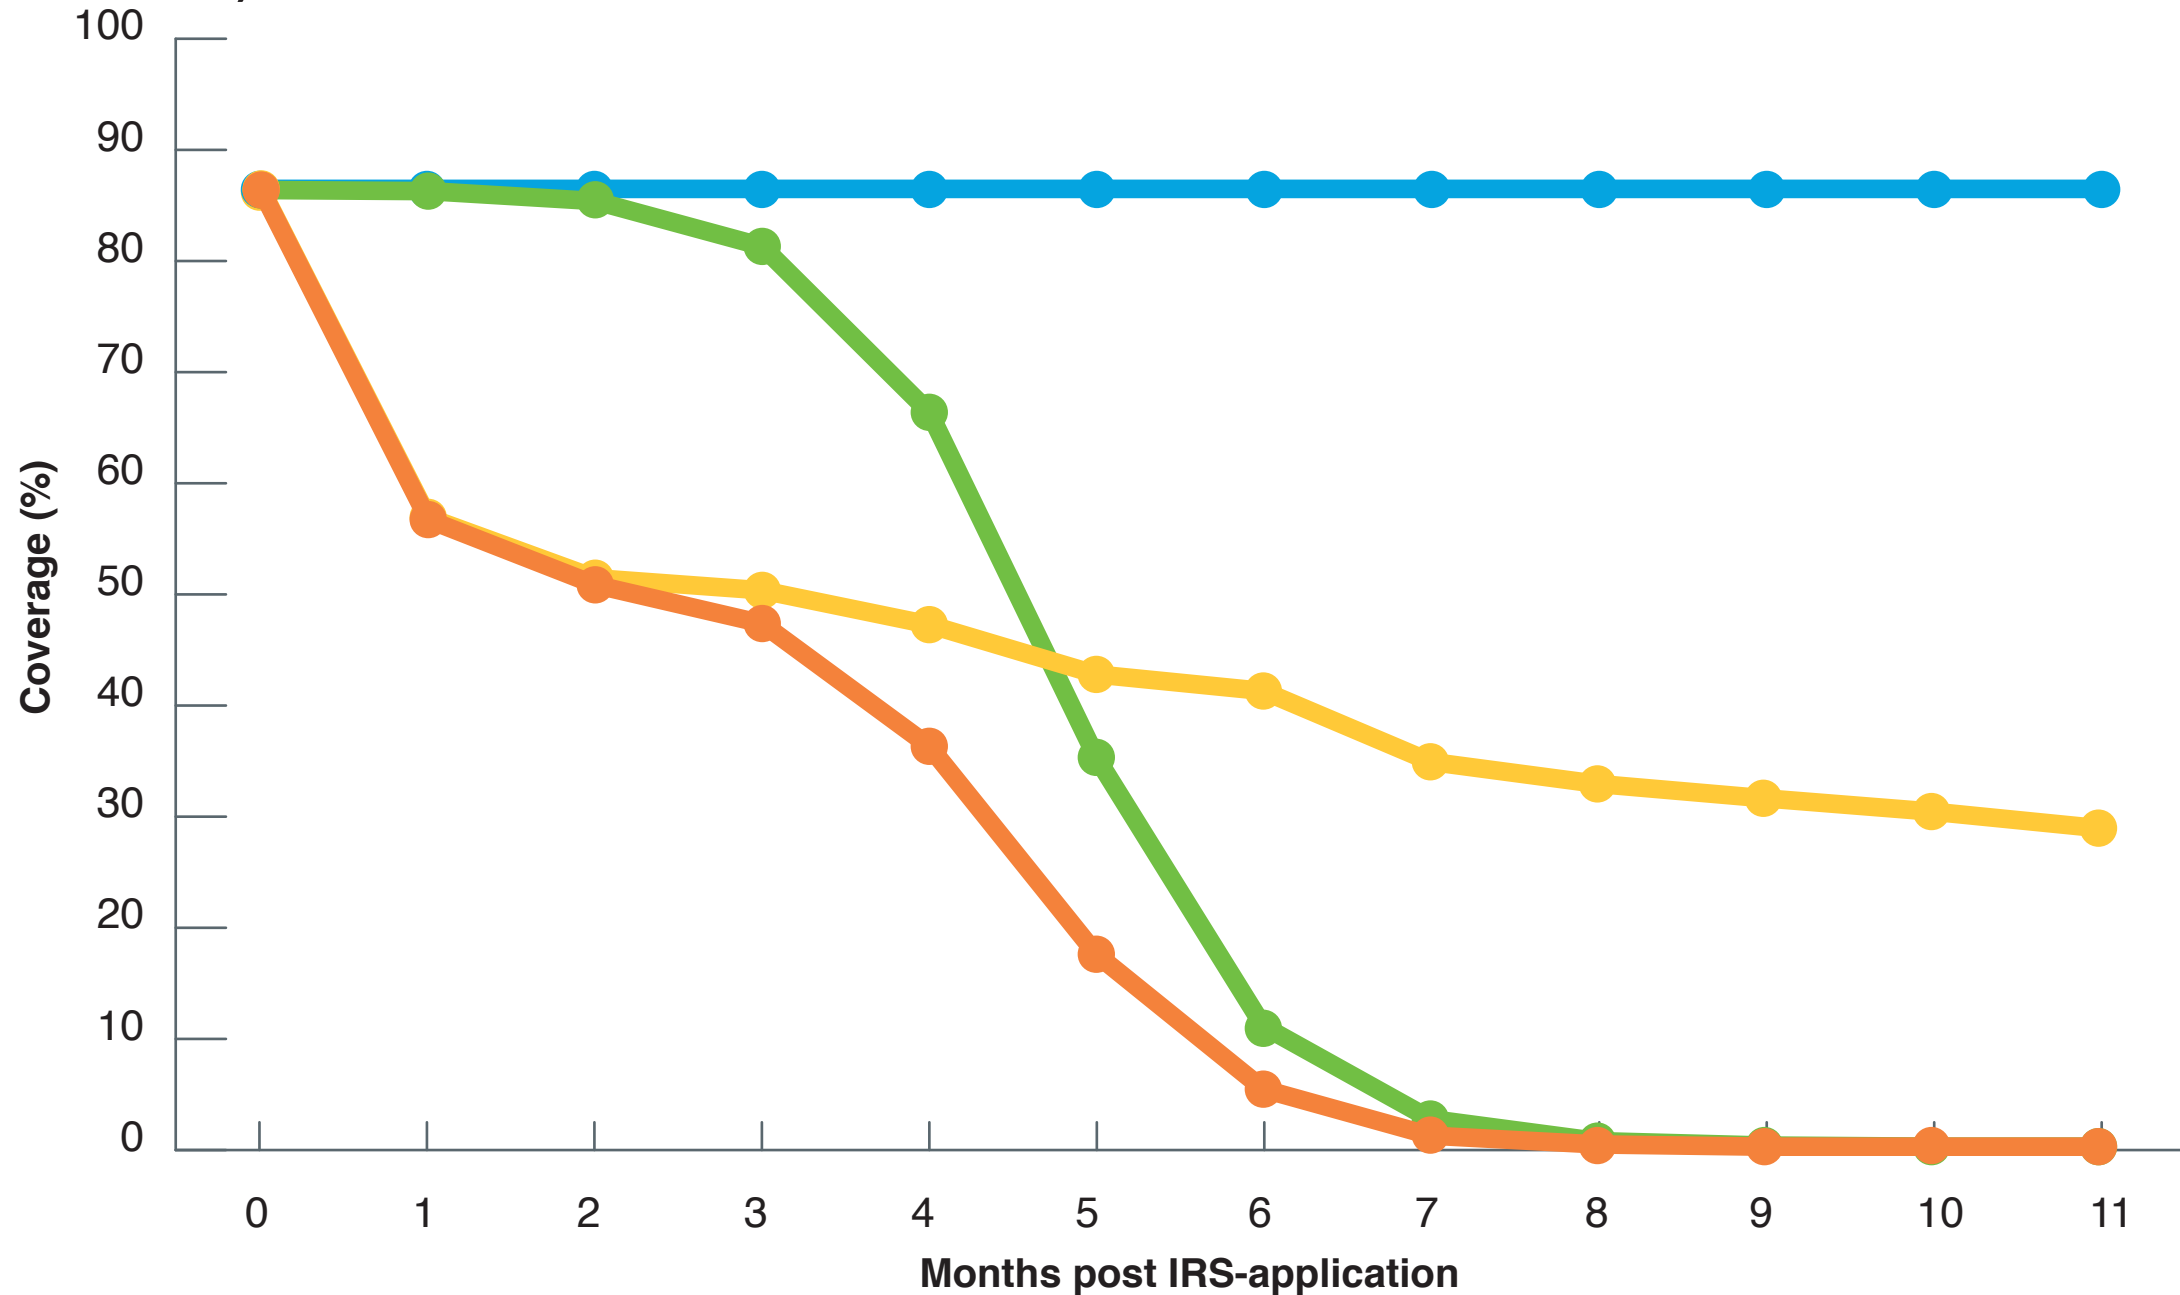

### B) India, IRS with DDT

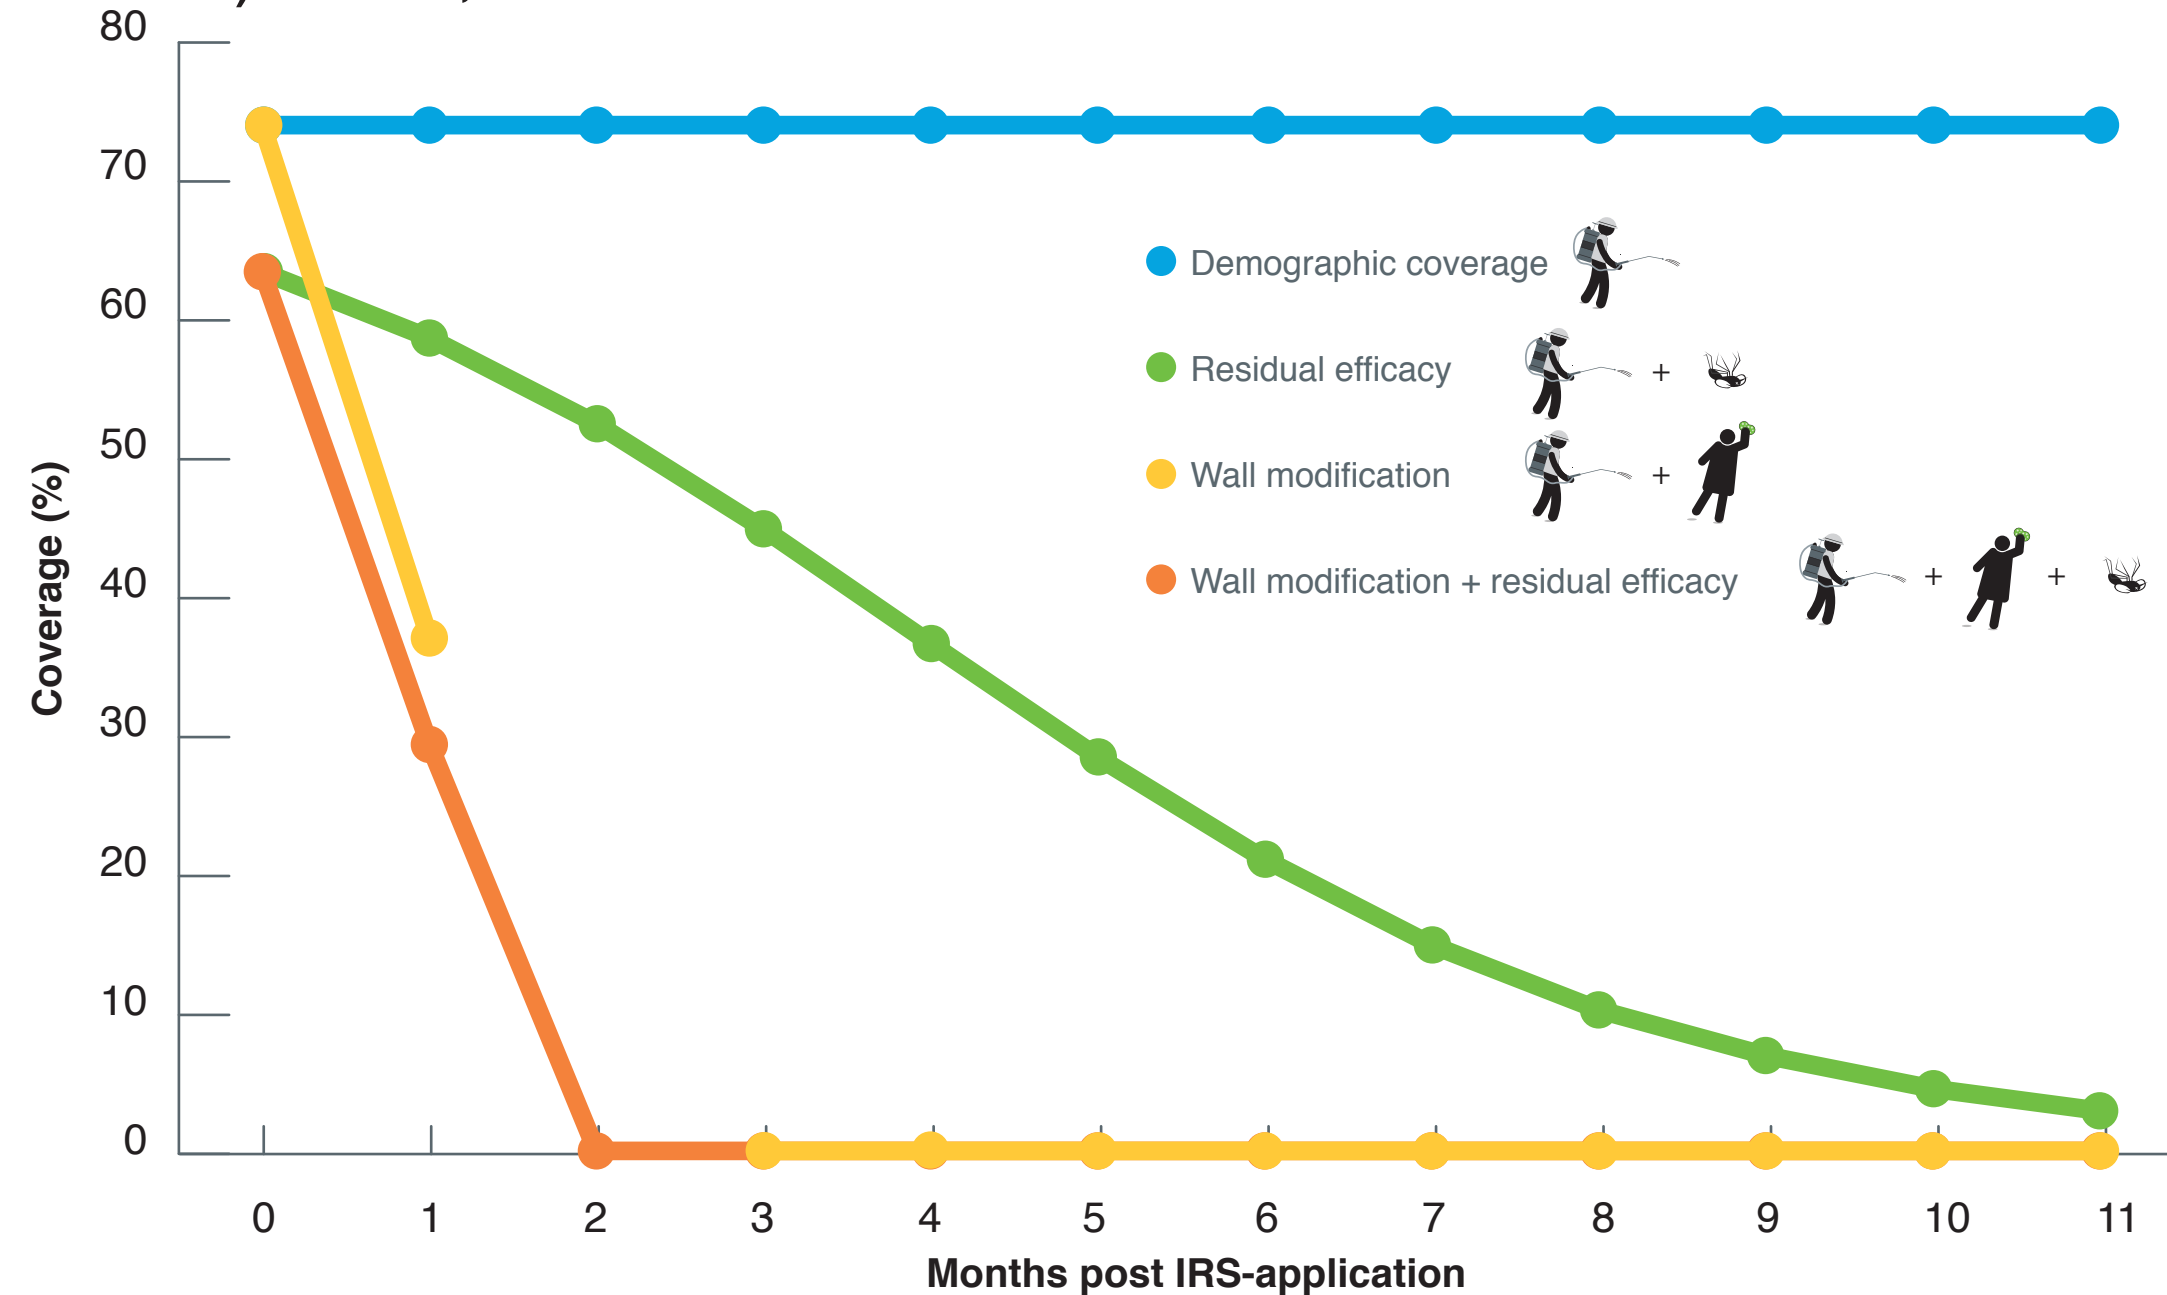

Supplement: 12936_2020_3102_MOESM1_ESM.pdf [file 12936_2020_3102_MOESM1_ESM.pdf]
